# Supplementary material
Source: PubMed Central journal article supplement (PMC4343308)
Supplement: mmc1.pdf [file mmc1.pdf]

# THE LANCET

## **Supplementary appendix**

This appendix formed part of the original submission and has been peer reviewed. We post it as supplied by the authors.

Supplement to: The ENOS Trial Investigators. Efficacy of nitric oxide, with or without continuing antihypertensive treatment, for management of high blood pressure in acute stroke (ENOS): a partial-factorial randomised controlled trial. *Lancet* 2014; published online Oct 22. [http://dx.doi.org/10.1016/S0140-6736\(14\)61121-1](http://dx.doi.org/10.1016/S0140-6736(14)61121-1).

1  
2  
3  
4  
5  
6  
7  
8  
9  
10  
11  
12  
13  
14  
15  
16  
17  
18  
19  
20  
21  
22  
23  
24  
25  
26  
27  
28  
29  
30  
31  
32  
33  
34  
35  
36  
37  
38  
39  
40  
41  
42  
43  
44  
45  
46  
47  
48  
49  
50  
51  
52  
53  
54  
55

## SUPPLEMENTARY APPENDIX

### TABLE OF CONTENTS

|                     |            |
|---------------------|------------|
| Study Investigators | Page<br>1* |
| Methods             | 10         |
| Tables              | 14         |
| Figures             | 16         |
| References          | 18         |

#### \* Study Investigators

##### Writing Committee

Philip M W Bath, Lisa Woodhouse, Polly Scutt, Kailash Krishnan, Joanna M Wardlaw, Daniel Berezcki, Nikola Sprigg, Eivind Berge, Maia Beridze, Valeria Caso, Chris Chen, Hanne Christensen, Ronan Collins, Anwar El Etribi, Ann Charlotte Laska, Kennedy R Lees, Serefnur Ozturk, Steve Phillips, Stuart Pocock, H Asita de Silva, Szabolcs Szatmari, Sally Utton.

**Trial Steering Committee:** D Thomas (Independent Chair to 2006, UK), G Venables (Independent Chair from 2006, UK), P Amarenco (Independent Physician, France), K Muir (Independent Physician, UK), P M W Bath (Chief Investigator, UK), N Sprigg (Deputy Chief Investigator, UK), E Berge (Norway), K R Lees (UK), S Pocock (Statistician from 2003, UK), A Shone (Sponsor's Representative, UK), A Skene (Statistician to 2003, UK), J M Wardlaw (Neuroradiologist, UK), D Whynes (Health economist, UK).

**International Advisory Committee:** P M W Bath (Chair, UK), E Berge (Norway), M Beridze (Georgia), C Bladin (Australia), V Caso (Italy), C Chen/H M Chang (Singapore), H Christensen (Denmark), R Collins (Eire), A Czlonkowska (Poland), E Díez-Tejedor (Spain), A El Etribi (Egypt), A R Ghani (Malaysia), J Gommans (New Zealand), A C Laska (Sweden), K R Lees (UK), J Navarro (Philippines), G Ntaios (Greece), S Ozturk (Turkey), S Phillips (Canada), K Prasad (India), H A de Silva (Sri Lanka), S Szatmari (Romania), L Wong (Hong Kong), Y-J Wang (China).

**Data Monitoring Committee:** P A G Sandercock (Chair, UK), K Asplund (Sweden), C Baigent (UK), with unblinded statistical support from Nottingham Clinical Trials Unit.

##### Trial Management Committee:

*Trial Managers:* S Utton (2006-14), C Weaver (2001-04)

*Assistant Trial Manager:* H Foster (2012-14)

*Medics:* S Ankolekar (2009-11), T England (2006-09), K Krishnan (2012-14), P Rashid (2001-03), G Sare (06-08), N Sprigg (2003-06), M Willmot (2002-04)

*International Coordinators:* S Ellender (2007-12), S Grant (2013-14), S MacAlpine (2007-08)

*UK Coordinators:* M Adrian (2012-14), A Durham (2013-14), U Ferentzi (2004-05), T Payne (2006-14)

*Outcome Coordinators:* L Cobane (2012-13), S Ellender (2007-13), L Kaur (2006-09), J Keeling (2013-14), V Stevens (2003), K Whittamore (2013-14), B Whysall (2000-04)

*Data managers:* D Hazle (2012-14), T Jones (2009-13), C Randall (2011-12), M Sampson (2013-14)

*Finance:* W Clarke (2001-14)

*Secretaries:* L Dunn (2013-14), Y Smallwood (2006-14)

56 **Serious Adverse Events Adjudicators:** D Bereczki (Chair, Hungary, 2002-14), N  
57 Sprigg (UK, 2010-14).

58  
59 **Neuroimaging Adjudicators:** J M Wardlaw (Chair, UK), A Adami (Italy, 2012-14), J  
60 Becker (UK, 2006-09), L Cala (Australia, 2012-14), A Casado (UK, 2013-), R Dineen  
61 (UK, 2003-14), P Koumellis (UK, 2008-10).

62  
63 **Statistical Analysis:** L Gray (2003-08), A Houlton (2012-13), J Leonardi-Bee (2001-  
64 03), C Renton (2009-12), P Scutt (2013-14), M Tracy (2008-09), L Woodhouse (2013-  
65 14).

66  
67 **Data Management and Programming:** L Haywood (2011-14), E Walker (2009-14), G  
68 Watson (2004-11), S Yeung (2001-07)

69  
70 **Grant Applicants:**  
71 *BUPA Foundation:* R N Baldwin, P M W Bath, K R Lees, G Mead, S Pocock, A Skene, J M  
72 Wardlaw, D Whynes.  
73 *Medical Research Council:* P M W Bath, K R Lees, S Pocock, J M Wardlaw, D Whynes.

74  
75 **National Coordinating Centres/National Coordinators**

76 Australia: C Bladin  
77 Canada: S Phillips  
78 China: Y-J Wang  
79 Denmark: H Christensen  
80 Egypt: A El Etribi  
81 Eire: R Collins  
82 Georgia: M Beridze  
83 Greece: G Ntaios  
84 Hong Kong: L Wong  
85 Italy: V Caso  
86 India: K Prasad  
87 Malaysia: A R Ghani  
88 New Zealand: J Gommans  
89 Norway: E Berge  
90 Poland: A Czlonkowska  
91 Philippines: J Navarro  
92 Romania: S Szatmari  
93 Singapore: C P L H Chen, H M Chang  
94 Spain: E Díez-Tejedor  
95 Sri Lanka: H A de Silva, C N Wijekoon  
96 Sweden: A C Laska  
97 Turkey: S Ozturk  
98 UK: P W M Bath, K R Lees, S Utton

99  
100 **Sponsors**

101 Australia, Canada, China, Egypt, Eire, Georgia, Greece, Hong Kong, India, Italy,  
102 Malaysia, New Zealand, Poland, Singapore, Spain, Sri Lanka, UK: University of  
103 Nottingham  
104 Denmark: University of Copenhagen; Bispebjerg Hospital  
105 Norway: Oslo University Hospital; Aalesund Hospital  
106 Romania: Mures County Emergency Hospital, Targu-Mures; Clinical Hospital of Neurology  
107 and Psychiatry, Oradea, Fogolyan Kristof Hospital, Sfantu-Gheorghe  
108 Sweden: Danderyd Hospital; Hassleholms Hospital; Malmo University; KSS Hospital,  
109 Skovde

- 110 Turkey: Selcuk University; Istanbul University; Ankara Numune Education and Research  
 111 Hospital; Gazi University  
 112
- 113 Participating Countries, Sites and Investigators**
- 114 *Australia (1):*  
 115 Box Hill Hospital (8): C Bladin, K Coughland  
 116 Telephone follow-up: A Buckland, Z Ross  
 117
- 118 *Canada (2):*  
 119 Queen Elizabeth II Health Sciences Centre (32): S Phillips, G Gubitz, G Pittman, J  
 120 Jarrett, K Dort, W Simpkin  
 121 Cape Breton Regional Hospital (1): M Maharaj, S Walker  
 122 Telephone follow-up: Y Reidy  
 123
- 124 *China (2):*  
 125 Tian Tan Hospital (16): Y J Wang, X Gong  
 126 The First Affiliated Hospital of Wenzhou Med. Coll (87): H Zhao  
 127 Telephone follow-up: Y Ma  
 128
- 129 *Denmark (3):*  
 130 University of Copenhagen (14): H Christensen, A Pedersen, L Willer, L Bentsen  
 131 Herlev Hospital (2): K Overgaard, M Poulsen, V Stan  
 132 Hillerod Hospital (1): M Papina  
 133 Telephone follow-up: L Christensen  
 134
- 135 *Egypt (4):*  
 136 Ainshams University (9): A Etribi  
 137 Al Zahraa Hospital (31): L Elmously, A M Hayam, S El Said  
 138 Assuit University Hospital (99): E Khedr, A El Dein, A M Ali  
 139 Menoufiya University (9): M Elwan, K Afifi  
 140 Telephone follow-up: N Ahmed, R Adel, H H Hay, N Abo-Elfetoh  
 141
- 142 *Georgia (3):*  
 143 Hospital of War Veterans (33): M Beridze, , L Kalichenko, T Kherkheulidze, T Kiladze  
 144 Barnovi City Hospital (7): A Gauarashvili, N Chaturia  
 145 Municipal Hospital, Georgia (155): N Kakabadze, S Mataradze, T Kherkheulidze  
 146 Telephone follow-up: D Eliauri  
 147
- 148 *Greece (1):*  
 149 Department of Medicine, University of Thessaly, Larissa University Hospital, Greece (12):  
 150 K Makaritsis, G Ntaios  
 151 Telephone follow-up: V Papavasileiou  
 152
- 153 *Hong Kong (1):*  
 154 Prince of Wales Hospital (4): L Wong, T Leung  
 155 Telephone follow-up: R Liu  
 156
- 157 *India (8):*  
 158 All India Institute of Medical Sciences (31): K Prasad, A Srivastava, M B Singh, M K  
 159 Sriwastva, M V Padma, M Tripathi, R Bhatia  
 160 Armed Forces Medical College (1): S P Gorthi  
 161 Army Hospital R & R (1): S P Gorthi  
 162 Christian Medical College & Hospital (68): J Pandian, N Akhtar, R Bhanot, Y Singh  
 163 JIPMER (20): S Narayan, A Murgai, M George, N Vangapandu, S Sharma, S A Dkhar

- 164 Lilavati Hospital & Research Centre (LKMM) (17): P Jiandani, P M Dalal, A Kiki, G  
 165 Bansode, P Bhat, S Adatia  
 166 Shree Krishna Hospital (7) Pramukhswami Medical College: S Desai, D Desai, S Sheth  
 167 SMS Medical College (12): D Khandelwal  
 168 Telephone follow-up: K Vidhya, K Gulati, P Niranjana  
 169  
 170 *Italy (3):*  
 171 University of Perugia (19): G Agnelli, M Acciarresi, V Caso  
 172 Hospital Maggiore Policlinico (5): G Torgano, P Santalucia  
 173 University of L'Aquila (9): S Sacco, A Carolei, P Ripa, S Ricci  
 174 Telephone follow-up: S Amici  
 175  
 176 *Malaysia (2):*  
 177 Hospital University Sains Malaysia (8): A R Ghani, A Husin, L H Keong  
 178 Sarawak General Hospital (6): L H Keong, L Y Lee, L San, S Suhara  
 179 Telephone: R Rahman  
 180  
 181 *New Zealand (4):*  
 182 Hawkes Bay Hospital (3): J Gommans  
 183 Auckland Hospital (1): N Anderson, P Bennett  
 184 Dunedin Hospital (64): M Furlong  
 185 Hutt Hospital (3): S Jayathissa, S Hasan  
 186 Telephone follow-up: D H Schmid  
 187  
 188 *Norway (2):*  
 189 Aalesund Hospital (3): Y Seljeseth  
 190 Oslo University Hospital Ulleval (1): S Vatn  
 191 Telephone follow-up: A Forarsveen  
 192  
 193 *Philippines (1):*  
 194 Jose R Reyes Medical Centre (16): J Navarro, A J Kalaw, B P Diccion, E Patawaran, G J  
 195 Arceo  
 196 Telephone follow-up: R Esagunde  
 197  
 198 *Poland (3):*  
 199 Institute of Psychiatry & Neurology (108): A Czlonkowska, A Kobayashi, K Grabska, M  
 200 Jasinska, T Mendel  
 201 Holy Spirit Specialist Hospital, Sandomierz (6): P Sobolewski, M Grzesik, M Śledzińska-  
 202 Dźwigał, R Hatałska-Żerebiec, W Szczuchniak  
 203 Military Medical Academy (9): J Kotowicz, B Brodacki, J Staszewski  
 204 Telephone follow-up: A Oskendra  
 205  
 206 *Republic of Ireland (1):*  
 207 Adelaide & Meath Hospital (10): R Collins, N Cogan  
 208 Telephone follow-up from UK  
 209  
 210 *Romania (3):*  
 211 Mures County Emergency Hospital (117): S Szatmari, A Bogdan, A Stoian, A Kovacs, E  
 212 Godo, E Incze, I Kazar, J Szasz, K Szocs, L Toma, N Fazakas, O Gyorfı, S Szentgyorgyi,  
 213 T Gligor, T Szilagyi, V Constantin, Z Bajko, Z Zima  
 214 Fogolyan Kristof Hospital (48): E Sisak  
 215 Spitalul Clinic Municipal, Oradea (52): A Jurcau, A Simion  
 216 Telephone follow-up: I Kazar, I Szocs  
 217  
 218 *Singapore (1):*

- 219 Singapore General Hospital campus/National Neuroscience Centre (155): H M Chang, A J  
 220 P Toh, D J Lim, H B Pey, S C Ng, W X Wong, X Y Xie  
 221 Telephone follow-up: A J P Toh, C Hong, D J Lim, H B Pey, N Wong, W X Wong  
 222  
 223 *Spain (2):*  
 224 La Paz University Hospital, UAM, IdiPAZ (2): E Diez-Tejedor, B Fuentes, P Martinez-  
 225 Sanchez  
 226 Hospital Universitari Joan XXIII de Tarragona (6): X Ustrell, A Pellise  
 227 Telephone follow-up: M I Pérez-Guevara  
 228  
 229 *Sri Lanka (2):*  
 230 University of Kelaniya (66): H A de Silva, B Subasinghe, C Pemasiri, C N Wijekoon , E A  
 231 P M Premarathne, K C D Mettananda, K D Nilakshi, M M H Fernando, N K B S S  
 232 Narasinghe, N S Madurapperuma, S M S G Gunarathna, S M T N Priyangika, S  
 233 Weerasinghe, S Wickramasinghe, T Nadeesha, U D C Nimanthi, U K Ranawaka  
 234 Colombo South Teaching Hospital (44): S B Gunatilake, A R Perera, C L Fernandopulle,  
 235 M G H D Thilakaratna, I Ranasinghe, K Bandara, K N Kumarapeli, M R Withana, S  
 236 Senanayake  
 237 Telephone follow-up: A S D Nandasiri, A G R M A Ranaweera, C A Jayasuriya, D  
 238 Abeynayake, H A D M P Ariyasinghe, I Dissanayaka, K D T Dinupa  
 239  
 240 *Sweden (4):*  
 241 Karolinska Institutet Danderyd Hospital (10): A-C Laska, E Isaksson, H Kumpulainen  
 242 Hassleholm Hospital, Sweden (1): M Esbjornsson  
 243 KSS Hospital, Sweden (2): B Cederin, A-C Elgasen  
 244 SUS/Malmo Hospital (1): M Jalakas, C Johnsson  
 245 Telephone follow-up: Å Franzén Dahlin  
 246  
 247 *Turkey (5):*  
 248 Ankara Numune Education and Research Hosp., Turkey (3): E Gurkas  
 249 Ankara University, Turkey (1): C Togay  
 250 Gazi University, Turkey (2): B Nazliel, A Gurses, H Caglayan  
 251 Istanbul University, Turkey(5): B Ince, D Uluduz  
 252 Selcuk University, Turkey (3): S Ozturk, F Ege, F Eren, H Ekmekci  
 253 Telephone follow-up: N Yardimci  
 254  
 255 *United Kingdom (116):*  
 256 Aberdeen Royal Infirmary (120): M McLeod, A Joyson, B A Al-Moyeed, H Gow, J Furnace,  
 257 M Bruce, M Kemp, P Acheampong, S Ross  
 258 Airedale NHS Trust (5): M Smith, S Mawer, B Hairsine, P Garnett, S Williamson  
 259 Altnagelvin Area Hospital, Londonderry (2): J Corrigan, C Diver-Hall, M Doherty  
 260 Antrim Area Hospital (12): M D Vahidassr, A Thompson, C McGoldrick, C Edwards, S  
 261 Hope  
 262 Arrowe Park Hospital, Wirral (7): R Davies, J Barrett, A Dodd, N Kearsley, P Weir  
 263 Barking, Havering & Redbridge University Hospitals (4): M Selim, K Darawil, H Kariuki, K  
 264 Dunne  
 265 Barnsley Hospital (71): M K Al-Bazzaz, A Ahmed, C Denniss, K Hawley, K Elliott, P  
 266 Anderton, P Torane, N P Muthumala, R Bassi, S Johnson-Holland  
 267 Basildon & Thurrock University Hospitals (4): R Rangasamy, U Umasankar, A Agarwal, B  
 268 Hadebe, B Smythe, F Huwez, H Ahmad, I Udeozor, M Bondoc, N Christmas, N R Gadi, N  
 269 Mguni, S Moyo  
 270 Basingstoke and North Hampshire Hospital (1): E Giallombardo, D Dellafera  
 271 Blackpool Victoria Hospital (52): J McIlmoyle, A Stewart, A Strain, C Jeffs, C Kelly, G  
 272 Chakrabarti, H Goddard, J Howard, M O'Donnell, S Preston

- 273 Borders General Hospital, Melrose (3): S Kerr, A McLaren, A Brown, M Mackay Bradford  
 274 Royal Infirmary (8): C Patterson, B Hairsine, L Johnston, R Bellfield, S Williamson  
 275 Broomfield Hospital (1): V Umachandran, F McNeela  
 276 Buckinghamshire Healthcare NHS Trust (14): M Burn, A Benford, A Misra, S MacTavish  
 277 Calderdale Royal Hospital, Halifax (2): P Rana, I Shakir, C Button, S Williamson  
 278 Charing Cross Hospital (26): P Sharma, A Kar, A Lemesiou, A Lacey, B Hazel, E  
 279 Beranova, J Pushpa-Rajah, O Halse, P Wilding, S Wegecsanyi, T Sachs, V Tilley  
 280 Chelsea & Westminster Hospital NHS Foundation Trust (Repatriation Site): M Pelly, H Lee  
 281 Chesterfield Royal Hospital (39): MA Sajid, J Cooke, S Punnose, A Agarwal, A Rashid, G  
 282 Ghaly, L Babar M Ball, R Gascoyne, T Hendra  
 283 City Hospitals, Sunderland NHS Foundation Trust (6): R O'Brien, A Smith, B Mokoena, C  
 284 Fox, D Barer, D Gulliver, J O'Connell, L Saliu, N Majmudar, R Beard, S Crawford  
 285 Countess of Chester Hospital NHS Foundation Trust  
 286 (7): K Chatterjee, C Kelly  
 287 County Durham and Darlington NHS Foundation Trust (115): A Mehrzad, B Esi, E  
 288 Brown, K V Baliga, M Matthews, R Hayman, S Clayton  
 289 Craigavon Area Hospital (1): P McCaffrey, C Douglas, M McCormick, M McParland  
 290 Cumberland Infirmary (1): P Davies, C Hagon, C Walker, H Woodford, L Armstrong  
 291 Darent Valley Hospital (1): P Aghoram, T Daniel  
 292 Derby Hospitals NHS Foundation Trust (67): T England, K Muhiddin, A Boyal, A  
 293 Hedstrom, C Roe, E Wright, G Powell, H Buckingham, I Memon, I Wynter, J Beavan, J  
 294 Scott, J Smith, J Clarke, L Mills, M Mangoyana, M Clarke, R Donnelly  
 295 Diana, Princess of Wales Hospital, Grimsby (9): J Adiotomre, J MacCormack, K Hannan,  
 296 K Short  
 297 Doncaster Royal Infirmary (47): D Chadha, Ann Lorna Holford, D Walstow, J Sayles, N  
 298 Betts  
 299 Erne Hospital, Enniskillen (2): B Keegan, J Kelly, C Diver-Hall, M Doherty  
 300 Fairfield General Hospital (20): K Kawafi, Amit Kumar Kishore, A Bell, D Knowles, D  
 301 Morse, J Stevens, L Johnson, L Harrison, N Saravanan, N A Thomas, R Namushi  
 302 Glasgow Royal Infirmary (35): P Langhorne, R Graham  
 303 Grantham District Hospital (2): V Sood, K Shelbourn  
 304 Guys and St Thomas Hospital (2): A Rudd, D Bhalla, E White, G Cluckie, I Davies, J  
 305 Birns, N Mitchell, M Chowdhury, S Raman, S Banfield,  
 306 Harrogate District Hospital (14): S Brotheridge, C Hare, G E Wihl, J Strover, S Appleby  
 307 Hereford County Hospital (4): C Jenkins, F Price, S Black, J Powell  
 308 Hillingdon Hospital, Uxbridge: A Parry, G Landers  
 309 James Cook University Hospital (52): D Broughton, A Atkinson, A Bergin, A Surendran,  
 310 D Tryambake, K Chapman, K Mitchelson, L Dixon  
 311 James Paget Hospital, Great Yarmouth (4): S M M Zaidi, P Harrison, M Girling, S Wace  
 312 John Radcliffe Hospital, Oxford (23): I Reckless, G Pope, J Hinkle, J Kennedy, K Michael,  
 313 M Westwood, R Teal  
 314 Kettering General Hospital (2): K Ayes, J Kessell  
 315 King's College Hospital NHS Trust (8): L Kalra, A Davis, C Potter, E Khoromana, I  
 316 Ahmed, J Aeron-Thomas, K Harvey, K Anderson  
 317 Leeds General Infirmary (19): J Bamford, J Greig, L Makawa, R Bellfield, S Williamson  
 318 Leicester Royal Infirmary (24): T Robinson, A K Mistri, D Eveson, F Brodie, M Dickens, N  
 319 Sprigg, P Christian, R Marsh, S Khan, S Treadwell, T Kumar, V Hauton  
 320 Lincoln County Hospital (174): S Leach, I Wahishi, J Sharma, J Wiseman, R Norton, R  
 321 Brown, S Arif, V Sherburn  
 322 Lister Hospital, Stevenage (7): D O'Kane, A Pusalkar, E Witness, K Chan  
 323 Macclesfield District General (36): M Sein, C Davison, A Barry, E Gibson, H Rooney, K  
 324 Walton, L Butler, L Wilkinson, M Horner  
 325 Monklands Hospital (35): M Barber, C McDermott, D Esson  
 326 Musgrove Park Hospital, Taunton (24): M Hussain, E Graham, E Homan, J Foot, R  
 327 Whiting, S Brown

- 328 New Cross Hospital, Wolverhampton (27): K Fotherby, D Butler, D Morgan, I Devi, K  
 329 Preece, P Bourke, S McBride, S Ramchandra  
 330 Newark Hospital (3): J Sharma, A C Rajapakse, P Kasinathan, C Rollinson  
 331 Newham General Hospital (29): A Jackson, B Depala, H Kariuki, H Syed, K Darawil, M  
 332 Ahmed, P Daboo  
 333 Ninewells Hospital, Dundee (10): R MacWalter, A Kelly  
 334 Norfolk & Norwich University Hospital (5): K Metcalf, E Thomas, G Ravenhill, J Jagger, N  
 335 Wyatt  
 336 North Devon Healthcare Trust, Barnstaple (1): M Dent, A Skinner, C Vernon, F  
 337 Hammonds, J Hunt, R Latif,  
 338 North Tees and Hartlepool NHS Foundation Trust (21): D Bruce, M Platton  
 339 Northampton General Hospital (7): M Blake, A Kannan, A David, P Lai  
 340 Northwick Park Hospital (113): D Cohen, M Mpelembue  
 341 Nottingham University Hospitals NHS Trust (310): C Gaynor, A Columbine, A Buck, A  
 342 Andrew, A Shetty, C Weaver, D Havard, F Shelton, F Hammond, G Sare, G  
 343 Subramanian, H Stear, I Wynter, J Roffe, J Saunders, J Clarke, K Richardson, K Mitchell,  
 344 L Wilkins, M Adrian, M Willmot, M Patel, N Handley, N Gilzeane, N Sprigg, P Cox, P Bath,  
 345 S Ankolekar, S Munshi, S Raghunathan, T England, U Ferentzi, W Sunman, Z Rose  
 346 Pilgrim Hospital (92): D Mangion, G Chibesakunda, K Shelbourn, M A Hardwick, R  
 347 Brown, V Sherburn  
 348 Pinderfields General Hospital, Wakefield (13): P Datta, A Das, A Needle, A Stanners, F  
 349 Razik, G Bateman, M Carpenter, R Davey  
 350 Poole Hospital, Dorset (5): S Ragab, C Dickson, E Cowan, L Gleave  
 351 Portsmouth Hospitals NHS Trust (9): D Jarrett, J Hewitt, J Williams, L Hyatt, T Dobson  
 352 Princess Alexandra Hospital, Harlow (11): S Mansoor, A Daniel, L Brown, N Walsh, N  
 353 Yogo, S Hameed  
 354 Queen Elizabeth Hospital, Birmingham (28): D Sims, A Belani, C Randall, J Hurley, J  
 355 McCormack  
 356 Queen Elizabeth Hospital, Gateshead (24): T Cassidy, B Mokoena, B McClelland, M  
 357 Bokhari  
 358 Rochdale Infirmary (6): R Namushi, A Bell, N A Thomas, S Moulton  
 359 Rotherham General Hospital (7): J Okwera, J Howe, K McNulty  
 360 Royal Albert Edward Infirmary, Wigan: S Herath, P Farren  
 361 Royal Blackburn Hospitals (8): M Goorah, A Singh, A Drysdale, A Bell, J Walford  
 362 Royal Cornwall Hospitals NHS Trust (4): F Harrington, G Courtauld  
 363 Royal Devon and Exeter Hospital (25): M James, A Hemsley, A Bowring, H Kingwell, J  
 364 Cageao, J Sword, L Boxall, N Wedge, P Mudd, S Elyas, S Keenan, W D Strain,  
 365 Royal Hallamshire Hospital, Sheffield (1): M Randall, S Skanathan, G Venables  
 366 Royal Infirmary of Edinburgh (7): G Mead, A Cormack, S Hart Royal Lancaster Infirmary  
 367 (9): P Kumar, C Culmsee  
 368 Royal Liverpool University Hospital (10): A Manoj, A Ledger, G Fletcher, P Lopez, P Cox,  
 369 S Loharuka  
 370 Royal Preston Hospital (13): S Punekar, B Gregory, S Raj, S Duberley  
 371 Royal United Hospital, Bath (4): L Shaw, B Madigan, D Button  
 372 Royal Victoria Infirmary, Newcastle-upon-Tyne (44): A Dixit, A Barkat, A Hughes, C  
 373 Stevenson, G Ford, J Davis, M Fawcett, S Crawford, T Thompson, V Hogg  
 374 Salford Royal NHS Foundation Trust (18): J Kallingal, A Singh, A Hall, A Ingham, A Bell,  
 375 A Majid, B Charles, E Campbell, J Perez, J Hardicre, K M Shaw, R Grue, R Jarapa, S  
 376 Marshall, S Mawn, T Whittle, V O'Loughlin, Z Naing  
 377 Scarborough General Hospital (16): J Paterson, K Deighton, R Rose, S Dyer, S J  
 378 Jamieson, V K Singh  
 379 Scunthorpe General Hospital (3): A Banerjee, C Gray, K Britteon, K Short, M A Sajid, M  
 380 S Atalla, T K Maitra  
 381 Sherwood Forest Hospitals (14): M Cooper, J Sharma, I Wynter, M Ball  
 382 Shrewsbury and Telford Hospital Trust (8): R Campbell, N Motherwell



- 383 Solihull Hospital (9): K Elfandi, A J Carter, A Hughes, C Stretton, J McCormack, J Khaira,  
 384 K Law, P Carr, S Stafford  
 385 South London Healthcare NHS Trust (23): L Sztriha, B Piechowski-Jozwiak, D Ramsey, E  
 386 Khoromana, E Parvathaneni, L Ajao  
 387 Southport & Formby District General Hospital (1): J Horsley, H Duff, J Langton, L  
 388 Bower, P McDonald, R Lawrence, S Wright,  
 389 St Georges Hospital, London (3): B Moynihan, F Kennedy, I Jones, I Davies, J O'Reilly, M  
 390 Niemierko, R Lewis  
 391 St Marys Hospital, Isle of Wight (2): E Hakim, G Smith  
 392 St Richards Hospital, Chichester (27): S Ivatts, I Kane, A Dunne, D Kerridge, G  
 393 Blackman, K Hedges, M Metiu, R Atabong-Nkeng, Y Baird  
 394 Staffordshire General Hospital (1): A Oke, B Clamp, C Brown, J Chembala, J Elizabeth, J  
 395 Hunter, K Weaver, L Phillips-Darby  
 396 Stepping Hill Hospital, Stockport (23): S Krishnamoorthy, M Datta Chaudhuri, A Brown,  
 397 H Cochrane, J Curtis, J McConiffe, K Dizayee,  
 398 Stobhill Hospital, Glasgow (5): C McAlpine, R Graham  
 399 Surrey & Sussex Healthcare NHS Trust (14): Y Abousleiman, A Jolly, S Collins  
 400 The Ipswich Hospital (2): J Ngeh, N Rands, S Stoddart  
 401 The Royal Bournemouth Hospital (9): J Kwan, A Orpen, B Longland, C Ovington  
 402 The Royal Free Hampstead NHS Trust, London (Repatriation Site): C Davie, V Bassan  
 403 The Royal London Hospital (13): P Gompertz, J Richards, R Erande, T Sachs  
 404 The Ulster Hospital (4): M Power, B Wroath, K Dynan, M Matthews  
 405 Torbay District General Hospital, Torquay (49): D Kelly, C Hilaire, C Bailey, D Tomlin, P  
 406 Fitzell, S Szabo  
 407 Trafford Healthcare NHS Trust, Manchester (2): S Anwar, A Hall  
 408 University College London Hospitals (7): R PerryA Shukla, A BanarasM Brezitski, N  
 409 Bhupathiraju, R Erande, V Bassan  
 410 University Hospital, Coventry (5): I Khan, C Randall, L Aldridge, M Pritchard  
 411 University Hospital Aintree (15): R Durairaj, E Bacabac, J Atherton, K Channell, M  
 412 Koufali, S Evans, T Ingram, V Sutton, Z Mellor  
 413 University Hospital of North Durham (3): B Esihi, E Brown, R Hayman  
 414 University Hospital of North Staffordshire, Stoke-on-Trent: C Roffe, A Barry, A Thakkar, A  
 415 Warusevitane, E Ward, G Muddegowda, H Maguire, I Massey, I Natarajan, J Chembala, J  
 416 Lucas, J Rushton, K Finney, K Castro, N Ahmad, R Sanyal, S Gomm, S Sills, U Ghani  
 417 University Hospitals, Bristol (7): S Caine, A Steele, J Dovey, N Devitt, P J Murphy,  
 418 Victoria Hospital, Kirkcaldy/Queen Margaret Hosp. (62): V Cvorov, B Ibrahim, D  
 419 Wilkinson, K McCormick, Y Abousleiman  
 420 Wansbeck General and North Tyneside Hospitals (17): C Price, A Barkat, A Smith, B  
 421 Mokoena, G Storey, K Mitchelson, R Lakey, S Huntley, V Riddell  
 422 Warrington & Halton Hospitals NHS Foundation Trust (2): K Mahawish, O Otaiku, G  
 423 Delaney-Segar, H Whittle, K Bunworth, L Connell  
 424 West Cumberland Hospital (4): P Davies, E Orugun, R Jolly  
 425 West Hertfordshire Hospitals NHS Trust (45): D Collas, E Walker, M Cottle, S Sundayi  
 426 West Suffolk Hospital (1): A Nicolson, J White, R Empson  
 427 Western General Hospital, Edinburgh (19): M Dennis, A Gunkel, B Colam, E L Kerr, E  
 428 Mamaloukas, J Selvarajah, N Arulraj, S Keir, W Whiteley  
 429 Western Infirmary, Glasgow (24): K Lees, B Manak, E Colquhoun, K Hajjar  
 430 Whiston Hospital, Prescot (8): V Gowda, S Dealing  
 431 Worthing Hospital (13): N Sengupta, J Kelly, A Dunne, C Buckingham, C Da Costa, C  
 432 Simmons, D Hughes, L Huggins, M Metiu, N Sengupta, R Gomez, R Patel, T Levett  
 433 Wythenshawe Hospital, South Manchester (Repatriation Site): E Gamble, B Charles, S  
 434 Mawn  
 435 Yeovil District Hospital (11): M Qadiri, A Russell, B Ockrim, C Buckley, D Gibbons, D  
 436 Hayward, J Kelly, C Buckley, D Gibbons, K Jenkins, K Rashed, L Martin, L Jones, N  
 437 Beacham, R Rowland-Axe, S Board, S Bulley

438 York Hospital (18): J Coyle, M Keeling, N Dyer, P Willcoxson  
439 Ysbyty Gwynedd (1): S Elghenzai, C Roberts, R Owen +

440

441 **Contributors**

442 All authors contributed to the interpretation of the results and writing of this report. As  
443 Chief Investigator, PMB prepared the protocol, supervised and reviewed the progress of  
444 the trial, recruited patients, and wrote the first draft of this report. Members of the  
445 writing committee participated in the steering committee, supervised and reviewed the  
446 progress of the trial, and commented on the draft of this report. LW and PS analysed  
447 trial data and commented on a draft of this report. All members of the writing committee  
448 listed here have seen and approved the final version of this report. The Data Monitoring  
449 Committee reviewed the manuscript.

450

451 **Declaration of Interests**

452 The trial was designed, run and funded independently of any manufacturer of glyceryl  
453 trinitrate. All authors declare that they have no conflicts of interest.

454

455

456

**457 METHODS**

458

**459 Training of Investigators**

460 All ENOS investigators were trained in the protocol, Good Clinical Practice, and use of the  
461 Scandinavian Stroke Scale, modified Rankin Scale (mRS) and Barthel Index.

462 Additionally, outcome assessors were trained in, and then tested with case scenarios, for  
463 the mRS.

464

**465 Schedule for Monitoring of Sites and Data Integrity**

466 Site monitoring was performed by each National Coordinating Centre (NCC) with the aim  
467 of ensuring quality control for the delivery of the protocol, collection of data and  
468 adherence with national regulations and ethics. Each recruiting site had a start-up visit  
469 for training and at least one monitoring visit; further visits were performed as deemed  
470 necessary by the NCC. Monitoring visits confirmed the presence of the participant and  
471 their consent, eligibility criteria, selected data critical to the trial (demographics,  
472 prescription of interventions, and blood pressure), and reported serious adverse events.

473

474 Central statistical monitoring of the data was performed according to Buyse *et al*<sup>1</sup> during  
475 the trial and prior to locking of the data. Checks included logic and range checks, digit  
476 preference, comparison of univariate data between sites, and comparison of multiple  
477 variable models between countries. The monitoring procedures were compliant with the  
478 requirements of the sponsor, the national ethics committees and regulatory authorities  
479 in the participating countries, and fulfilled Good Clinical Practice requirements.

480

**481 Sample Size Considerations**

482 The trial was originally designed to recruit 5,000 patients so as to detect an absolute risk  
483 reduction in the binary outcome of death or dependence (modified Rankin Scale,  
484 mRS>2) of 5% from 50% in the control group to 45% in the GTN group (equivalent to  
485 odds ratio 0.82), with power 90%, significance 5%, and allowance for losses to follow-  
486 up. The original planned method of analysis, as published in the protocol paper,<sup>2</sup> was to  
487 compare the proportion of patients who were dead or dependent at 90 days between the  
488 treatment groups.

489

490 The method for the primary analysis of the mRS was changed when it became clear that  
491 binary analysis of the 7-level mRS is sub-optimal and that statistical power is increased  
492 by using all the data at each level by comparing differences in distribution across the  
493 whole scale between the treatment groups.<sup>3</sup> This approach is now recommended by the  
494 European Stroke Organisation.<sup>4</sup> A further, and additional, increase in statistical power is  
495 achieved by incorporating key prognostic baseline variables as covariates.<sup>5</sup> Other groups  
496 have presented similar findings and used this approach.

497

498 The revised statistical analysis plan was based on assessment of the shift in mRS  
499 between the treatment groups (GTN/no GTN; continue/stop pre-stroke BP medications),  
500 as analysed using ordinal logistic regression, with adjustment for covariates. The overall  
501 proposal to change the method of analysis of the primary outcome from binary to ordinal  
502 was first presented to, and agreed by, the Trial Steering Committee in January 2008,  
503 and confirmed in 2009. An early draft version of this SAP, highlighting this change, was  
504 posted on the trial website in April 2009. This change to the design of ENOS was made  
505 without knowledge of any interim analysis that split patients by treatment group. The  
506 statistician who prepares analyses for the independent Data Monitoring Committee  
507 (DMC), and the DMC themselves, were not involved in the writing of this statistical  
508 analysis plan (SAP), and have not seen or commented on it.

509

**510 Data Monitoring Committee (DMC)**

511 The DMC was responsible for safeguarding the interests of trial patients, assessing the

512 safety and efficacy of the intervention during the trial, assessing data integrity, and for  
 513 monitoring the overall conduct of the trial. The DMC reviewed the recruitment of  
 514 patients, and assessed safety and efficacy measures by treatment group. Data were  
 515 reviewed twice yearly throughout the recruitment period of the trial. The DMC was  
 516 charged with informing the Trial Steering Committee if, at any time, the data showed  
 517 evidence beyond reasonable doubt of a difference between the randomised groups in the  
 518 primary outcome. They also considered these data in the light of external information  
 519 such as results from completed trials. No formal interim analyses were performed.  
 520 However, the DMC could perform statistical comparisons as they deemed necessary,  
 521 with stopping criteria based on the Haybittle-Peto stopping rule (i.e. a difference of 3  
 522 standard errors is considered as clear evidence of a treatment effect). The study was not  
 523 terminated early and the committee did not request any additional analyses of the data.  
 524

## 525 **Inclusion and Exclusion Criteria**

### 526 *Inclusion criteria*<sup>2</sup>

- 527 a) Adult (age > 18 years).
- 528 b) Clinical stroke syndrome with limb weakness lasting at least 1 hour (i.e. not likely  
 529 to be a transient ischaemic attack).
- 530 c) Residual limb weakness at the time of enrolment (SSS Arm <6 and/or Leg <6,  
 531 appendix C).
- 532 d) Onset < 48 hours. If the time of onset is unknown, apply the time when the patient  
 533 was last known to be well. [This timeframe covers the period of maximum  
 534 uncertainty over altering blood pressure and should permit the vast majority of  
 535 otherwise eligible patients to be recruited]
- 536 e) Conscious (Glasgow Coma Scale > 8).
- 537 f) Systolic blood pressure in range 140 mmHg to 220 mmHg inclusive on the basis of  
 538 at least one of the three baseline pre-randomisation measures.
- 539 g) Independent prior to stroke (pre-morbid modified Rankin Scale < 2).
- 540 h) Meaningful consent, or assent from a relative or carer if the patient is unable to  
 541 give meaningful consent (e.g. in cases of dysphasia, confusion, or reduced  
 542 conscious level).

### 543 *Exclusion criteria*

- 545 a) Definite need for nitrate therapy: e.g. concurrent myocardial infarction, unstable  
 546 angina, left ventricular failure. Patients admitted on nitrates for the management of  
 547 stable angina may stop these for the 7 day trial treatment period.
- 548 b) Contraindication to nitrate therapy: e.g. hypersensitivity to nitrates, dehydration,  
 549 hypovolaemia, hypertrophic obstructive cardiomyopathy, aortic stenosis, cardiac  
 550 tamponade, constrictive pericarditis, mitral stenosis, marked anaemia, closed-angle  
 551 glaucoma, sildenafil (Viagra) or related drug, within 24 hours.
- 552 c) Definite need for pre-stroke antihypertensive, anti-anginal or anti-heart failure  
 553 medication: e.g. concurrent angina, heart failure.
- 554 d) Definite need for new antihypertensive, anti-anginal or anti-heart failure medication  
 555 during acute stroke: e.g. concurrent angina, heart failure, hypertensive  
 556 encephalopathy, aortic dissection.
- 557 e) Need for new antihypertensive therapy to lower systolic blood pressure to achieve  
 558 the enrolment range of 140-220mmHg
- 559 f) New (not prescribed pre-stroke) antihypertensive medication commenced after  
 560 stroke onset
- 561 g) Pure sensory stroke.
- 562 h) Isolated dysphasia.
- 563 i) Patients *expected*, on the basis of existing investigations, to require surgical  
 564 intervention (e.g. clot evacuation, carotid endarterectomy) during the treatment or  
 565 follow-up period.
- 566 j) *Known* intracerebral pathology other than stroke, e.g. subarachnoid haemorrhage,

567 brain tumour, cerebral abscess.

568 k) Other serious condition which is likely to prevent outcome assessment at 90 days,  
569 e.g. advanced cancer.

570 l) Previous enrolment in ENOS.

571 m) Current involvement in another trial of an experimental drug. [Patients may be  
572 randomised into observational studies or non-drug trials.]

573 n) Not available for follow-up, e.g. no fixed address, overseas visitor.

574 o) Females of childbearing potential where pregnancy cannot be excluded by a  
575 negative pregnancy test, pregnancy, or breastfeeding.

576  
577 **Definition of events**

578 All serious adverse events, as entered into the database by the Site Investigator, were  
579 adjudicated by clinical experts who were blinded to treatment assignment. Investigators  
580 completed data entry according to the following definitions:<sup>2</sup>

581  
582 *Acute Stroke Unit*

583 A high-dependency nursing unit (or area) caring only/mainly for patients with acute  
584 stroke and providing close monitoring of neurological and vascular signs.

585  
586 *Disposition*

587 Home, institution (e.g. warden controlled, nursing home), dead.

588  
589 *Neurological deterioration*

590 A reduction in SSS of > 5 points, or decrease in consciousness level by > 2 points, as  
591 compared with baseline.

592  
593 *Recurrent stroke*

594 Classified as haemorrhagic or ischaemic (if documented by CT scan or autopsy), or of  
595 unknown type. The time from stroke onset and side will be noted. (This definition  
596 deliberately does not attempt to differentiate true recurrence from extension of the  
597 presenting lesion since this is clinically and radiologically difficult unless recurrence  
598 occurs in a new arterial territory.)

599  
600 *Significant hypotension*

601 A symptomatic fall in blood pressure of > 20% as compared with baseline necessitating  
602 intervention with intravenous colloid or crystalloid (saline).

603  
604 *Stroke Rehabilitation Unit*

605 A dedicated rehabilitation unit (or area) caring only/mainly for patients with recent  
606 stroke and providing multi-disciplinary therapy (e.g. physiotherapy, occupational  
607 therapy, speech & language therapy).

608  
609 *Symptomatic intracranial haemorrhage*

610 Neurological deterioration, or death, associated with significant intracranial haemorrhage  
611 found on CT scan or autopsy.

612  
613 **Neuroimaging Scan Adjudication**

614 CT or MRI brain scans were performed according to local site practice at baseline in all  
615 patients to confirm the diagnosis. Sites were asked to also perform a follow-up research  
616 scan at day 7±1 where patients had provided consent for the additional scan at the time  
617 of enrolment. Sites could also perform follow-up scans at any time point after enrolment  
618 according to clinical need. The above neuroimages were submitted to the International  
619 Coordinating Centre in Nottingham using one of three methods:

- 620 a) Sent by courier as a film. Images were then digitised using a Vicom digitiser  
621 (VIDAR Diagnostic Pro Advantage, USA).

- 622 b) Uploaded onto the trial website as uncompressed encrypted non-anonymised  
623 digital DICOM files. Once the trial system had validated the files against the  
624 expected patient details, the files were then anonymised.
- 625 c) Sent by courier on a CD-ROM or DVD, with files in DICOM format with pseudo-  
626 anonymisation of patient details; the patients was identified with their unique  
627 study number and initials.

628 When reviewed, some images were in non-DICOM format (e.g. .PNG, .JPG) and these  
629 were converted to DICOM. The anonymised image files, collected as above, were  
630 presented to a panel of adjudicators using a browser-based system driven from the trial  
631 database. Adjudicators were trained and assessed using the ACCESS system  
632 ([www.neuroimage.co.uk/sirs](http://www.neuroimage.co.uk/sirs)),<sup>6,7</sup> and reviewed scans blinded to treatment assignment.  
633 Adjudication parameters were derived from the IST-3 image adjudication system (J  
634 Wardlaw, submitted for publication), and included information on:

- 635 a) Presence of an acute stroke lesion: location, mass effect and presence of  
636 secondary ischaemia.
- 637 b) Presence of pre-stroke changes: atrophy, white matter hyperintensities, old  
638 stroke.

639 Information from adjudication was used to inform the final diagnosis for all patients with  
640 a received scan; where clinical and radiological information were incongruent, JMW  
641 performed a second adjudication to confirm imaging findings. Patients presenting with  
642 an intracerebral haemorrhage had haematoma volume estimated on a visual scale, and  
643 measured using the ABC/2 method with presentation of images using OSIRIX (version 3,  
644 32 bit) on an Apple Mac.

645  
646  
647  
648

649 **Web Table 1. Additional baseline characteristics for patients randomised to**  
 650 **continue versus stop pre-stroke antihypertensive drugs.**  
 651

| Characteristic                  | Continue    | Stop        |
|---------------------------------|-------------|-------------|
| Number of patients              | 1053        | 1044        |
| Treated high BP †∞              | 1047 (99.4) | 1039 (99.5) |
| ACE-Inhibitor                   | 533 (50.6)  | 466 (44.6)  |
| Angiotensin receptor antagonist | 157 (14.9)  | 180 (17.2)  |
| Beta-receptor antagonist        | 407 (38.7)  | 413 (39.6)  |
| Calcium channel blocker         | 343 (32.6)  | 382 (36.6)  |
| Diuretic                        | 372 (35.3)  | 363 (34.8)  |
| Alpha-receptor antagonist       | 78 (7.4)    | 68 (6.5)    |
| Centrally acting drug           | 19 (1.8)    | 13 (1.2)    |
| Other                           | 15 (1.4)    | 8 (0.8)     |
| No. of BP drugs                 |             |             |
| 0                               | 6 (0.6)     | 5 (0.5)     |
| 1                               | 454 (43.1)  | 461 (44.2)  |
| 2                               | 371 (35.2)  | 358 (34.3)  |
| 3                               | 164 (15.6)  | 171 (16.4)  |
| 4                               | 52 (4.9)    | 41 (3.9)    |
| 5                               | 5 (0.5)     | 8 (0.8)     |
| 6                               | 1 (0.1)     | 0 (0)       |
| Median [IQR]                    | 2 [1]       | 2 [1]       |
| Mean (SD)                       | 1.8 (0.9)   | 1.8 (0.9)   |
| Fluids and feeding              |             |             |
| Normal diet                     | 424 (40.3)  | 390 (37.4)  |
| Soft diet                       | 253 (24.0)  | 256 (24.5)  |
| Nasogastric tube                | 49 (4.7)    | 54 (5.2)    |
| Percutaneous feeding tube       | 4 (0.4)     | 3 (0.3)     |
| Intravenous/subcutaneous fluids | 207 (19.7)  | 219 (21.0)  |
| No feeding/fluids               | 116 (11.0)  | 122 (11.7)  |

652

653 † Stratification variable

654 ∞ 11 patients inadvertently entered into continue-stop arm of trial

655

656

657

658 **Web Table 2. Adherence with allocated treatment: glyceryl trinitrate versus no glyceryl trinitrate, and continue versus**  
 659 **stop pre-stroke antihypertensive drugs.**  
 660

| Compliance                                  | All         | GTN         | No GTN      | All         | Continue   | Stop       |
|---------------------------------------------|-------------|-------------|-------------|-------------|------------|------------|
| Number of patients with data                | 4002        | 1996        | 2006        | 2095        | 1051       | 1044       |
| Adherence with first dose                   | 3938 (98.4) | 1939 (97.1) | 1999 (99.7) | 1732 (82.7) | 745 (70.9) | 987 (94.5) |
| Adherence during first 4 days               | 3669 (91.7) | 1711 (85.7) | 1958 (97.6) | 1548 (73.9) | 681 (64.8) | 867 (83.0) |
| Adherence during all 7 days                 | 3423 (85.5) | 1490 (74.6) | 1933 (96.4) | 1420 (67.8) | 610 (58.0) | 810 (77.6) |
| Non-adherence with all randomised treatment | 25 (0.6)    | 24 (1.2)    | 1 (0.1)     | 117 (5.6)   | 93 (8.8)   | 24 (2.3)   |
| Reasons for non-adherence by day 4          | 333 (8.3)   | 285 (14.3)  | 48 (2.4)    | 547 (26.1)  | 370 (35.2) | 177 (17.0) |
| Discharge before day 4                      | 58 (1.4)    | 46 (2.3)    | 12 (0.6)    | 51 (2.4)    | 38 (3.6)   | 13 (1.2)   |
| Adverse event, unacceptable                 | 31 (0.8)    | 30 (1.5)    | 1 (0.1)     | 26 (1.2)    | 8 (0.8)    | 18 (1.7)   |
| Headache                                    | 13 (0.3)    | 12 (0.6)    | 1 (0.1)     | 6 (0.3)     | 2 (0.2)    | 4 (0.4)    |
| Death before day 4                          | 51 (1.3)    | 32 (1.6)    | 19 (0.9)    | 31 (1.5)    | 15 (1.4)   | 16 (1.5)   |
| Serious adverse event, non-fatal            | 28 (0.7)    | 26 (1.3)    | 2 (0.1)     | 29 (1.4)    | 16 (1.5)   | 13 (1.2)   |
| Withdrawal of consent                       | 15 (0.4)    | 14 (0.7)    | 1 (0.1)     | 3 (0.1)     | 1 (0.1)    | 2 (0.2)    |
| Physician withdrawal                        | 13 (0.3)    | 12 (0.6)    | 1 (0.1)     | 8 (0.4)     | 1 (0.1)    | 7 (0.7)    |
| Other reason                                | 137 (3.4)   | 125 (6.3)   | 12 (0.6)    | 399 (19.0)  | 291 (27.7) | 108 (10.3) |

661  
 662 Data refer to GTN or any antihypertensives taken during days 1-7, and are number of patients (%). Patients receiving at least first 4  
 663 doses are considered to have had complete treatment.  
 664



**Web Table 3. Blood pressure lowering treatment during the 7 day treatment period: continue versus stop pre-stroke antihypertensive drugs.**

|                                         | Continue   | Stop       |
|-----------------------------------------|------------|------------|
| Patients with data                      | 1051       | 1044       |
| Drug class                              |            |            |
| Angiotensin converting enzyme inhibitor | 516 (49.1) | 80 (7.7)   |
| Angiotensin receptor antagonist         | 162 (15.4) | 19 (1.8)   |
| Beta-receptor antagonist                | 386 (36.7) | 92 (8.8)   |
| Calcium channel blocker                 | 336 (32.0) | 60 (5.7)   |
| Diuretic                                | 355 (33.8) | 65 (6.2)   |
| Alpha receptor antagonist               | 75 (7.1)   | 7 (0.7)    |
| Centrally acting drug                   | 13 (1.2)   | 2 (0.2)    |
| Other                                   | 23 (2.2)   | 12 (1.1)   |
| Number of drugs                         |            |            |
| 0                                       | 63 (6.0)   | 824 (78.9) |
| >0                                      | 988 (94.0) | 220 (21.1) |
| 1                                       | 405 (38.5) | 142 (13.6) |
| 2                                       | 357 (34.0) | 46 (4.4)   |
| 3                                       | 167 (15.9) | 27 (2.6)   |
| 4                                       | 50 (4.8)   | 3 (0.3)    |
| 5                                       | 8 (0.8)    | 2 (0.2)    |
| 6                                       | 1 (0.1)    | 0 (0)      |
| Median [IQR]                            | 2 [1]      | 0 [0]      |
| Mean (SD)                               | 1.8 (1.0)  | 0.3 (0.7)  |

Data are based on answers to individual drug classes, and are number (%), median [interquartile range, IQR] or mean (standard deviation, SD).

**Web Table 4. Blood pressure (mmHg) at baseline and day 7, by number of antihypertensive drugs at baseline: continue versus stop pre-stroke antihypertensive drugs.**

| No. drugs | Baseline     | Day 7        |              | Difference    | 2p              |
|-----------|--------------|--------------|--------------|---------------|-----------------|
|           |              | Continue     | Stop         |               |                 |
| 1         | 166.5 / 88.8 | 147.5 / 81.7 | 152.3 / 83.8 | -4.8 / -2.1   | 0.011 / 0.046   |
| 2         | 167.1 / 88.4 | 143.6 / 78.8 | 155.2 / 85.9 | -11.6 / -7.1  | <0.001 / <0.001 |
| 3         | 167.3 / 86.6 | 145.3 / 78.9 | 155.8 / 84.9 | -10.6 / -6.1  | 0.001 / 0.002   |
| >3        | 172.3 / 89.3 | 143.5 / 78.2 | 174.0 / 91.5 | -30.5 / -13.3 | <0.001 / <0.001 |

Data are mean. Comparison assessed using multiple regression adjusted for baseline.

**Web Table 5. Interaction between treatment with GTN versus no GTN, and continue versus stop pre-stroke antihypertensive drugs, for baseline-adjusted systolic and diastolic blood pressure, and heart rate, and absolute mean and median modified Rankin Scale score, across the 6 treatment groups.**

| GTN                 | Yes          | No    | Yes          | Yes          | No           | No         | P       |
|---------------------|--------------|-------|--------------|--------------|--------------|------------|---------|
| Continue            | N/A          | N/A   | Yes          | No           | Yes          | No         |         |
| Systolic BP (mmHg)  |              |       |              |              |              |            |         |
| Day 1               | <b>-10.7</b> | -3.1  | <b>-10.7</b> | <b>-10.2</b> | -4.7         | -3.2       | <0.0001 |
| Day 7               | -16.8        | -16.2 | <b>-22.5</b> | -14.1        | <b>-19.4</b> | -12.3      | <0.0001 |
| Diastolic BP (mmHg) |              |       |              |              |              |            |         |
| Day 1               | -5.6         | -1.7  | -4.9         | -4.8         | -1.7         | -1.3       | <0.0001 |
| Day 7               | <b>-7.4</b>  | -5.4  | <b>-8.5</b>  | -4.0         | <b>-7.0</b>  | -3.0       | <0.0001 |
| Heart rate (bpm)    |              |       |              |              |              |            |         |
| Day 1               | <b>1.4</b>   | 0.1   | 0.6          | <b>1.5</b>   | -0.3         | 0.1        | 0.004   |
| Day 7               | -1.0         | -1.1  | -0.3         | <b>2.3</b>   | -1.5         | <b>2.8</b> | <0.0001 |
| mRS (/6)            |              |       |              |              |              |            |         |
| Mean                | 2.9          | 2.9   | 3.3          | 3.2          | 3.4          | 3.3        | NS      |
| Median              | 3.0          | 3.0   | 3.0          | 3.0          | 3.5          | 3.0        | NS      |

Adjusted data take account of baseline value. Comparisons by Analysis of Variance. Bold identifies largest changes.

Bpm: beats per minute; DBP: diastolic blood pressure; NS: not significant; SBP: systolic blood pressure

1 **Web Table 6. Number of patients with serious adverse events during follow-up**  
 2 **to day 90: glyceryl trinitrate versus no glyceryl trinitrate, and continue versus**  
 3 **stop pre-stroke antihypertensive drugs.**  
 4

| Cause                                | All          |              | Fatal       |             | All      |             | Fatal    |             |
|--------------------------------------|--------------|--------------|-------------|-------------|----------|-------------|----------|-------------|
|                                      | GTN          | No GTN       | GTN         | No GTN      | Continue | Stop        | Continue | Stop        |
| Complication of initial stroke       | 40<br>(2.0)  | 31<br>(1.5)  | 31<br>(1.6) | 28<br>(1.4) | 19 (1.8) | 16<br>(1.5) | 16 (1.5) | 13<br>(1.2) |
| Extension of initial stroke          | 59<br>(3.0)  | 37<br>(1.8)  | 18<br>(0.9) | 11<br>(0.5) | 33 (3.1) | 23<br>(2.2) | 13 (1.2) | 5<br>(0.5)  |
| †                                    |              |              |             |             |          |             |          |             |
| Symptomatic intracranial haemorrhage | 59<br>(3.0)  | 45<br>(2.2)  | 17<br>(0.9) | 16<br>(0.8) | 30 (2.8) | 35<br>(3.4) | 8 (0.8)  | 12<br>(1.1) |
| Recurrent stroke                     | 47<br>(2.4)  | 35<br>(1.7)  | 11<br>(0.6) | 9<br>(0.4)  | 25 (2.4) | 27<br>(2.6) | 5 (0.5)  | 8<br>(0.8)  |
| Myocardial infarction                | 19<br>(1.0)  | 22<br>(1.1)  | 7<br>(0.4)  | 12<br>(0.6) | 11 (1.0) | 16<br>(1.5) | 7 (0.7)  | 6<br>(0.6)  |
| Sudden cardiac death                 | -            | -            | 6<br>(0.3)  | 6<br>(0.3)  | -        | -           | 1 (0.1)  | 5<br>(0.5)  |
| Other cardiovascular event           | 118<br>(5.9) | 104<br>(5.2) | 12<br>(0.6) | 14<br>(0.7) | 63 (6.0) | 75<br>(7.2) | 10 (0.9) | 7<br>(0.7)  |
| Pulmonary embolism                   | 26<br>(1.3)  | 19<br>(0.9)  | 6<br>(0.3)  | 9<br>(0.4)  | 11 (1.0) | 13<br>(1.2) | 6 (0.6)  | 5<br>(0.5)  |
| Pneumonia                            | 117<br>(5.9) | 122<br>(6.1) | 70<br>(3.5) | 77<br>(3.8) | 88 (8.4) | 63<br>(6.0) | 50 (4.7) | 46<br>(4.4) |
| †                                    |              |              |             |             |          |             |          |             |
| Other event                          | 28<br>(1.4)  | 28<br>(1.4)  | 4<br>(0.2)  | 2<br>(0.1)  | 13 (1.2) | 18<br>(1.7) | 2 (0.2)  | 2<br>(0.2)  |

5  
 6 Data are number of patients (%). Comparison by Chi-square test: † P≤0.05; all other  
 7 comparisons are non-significant. Definitions for some events are given above, and in the  
 8 Statistical Analysis Plan.<sup>8</sup>  
 9  
 10  
 11

# Web Figure 1a. Systolic and diastolic blood pressure over 7 days: glyceryl trinitrate versus no glyceryl trinitrate.

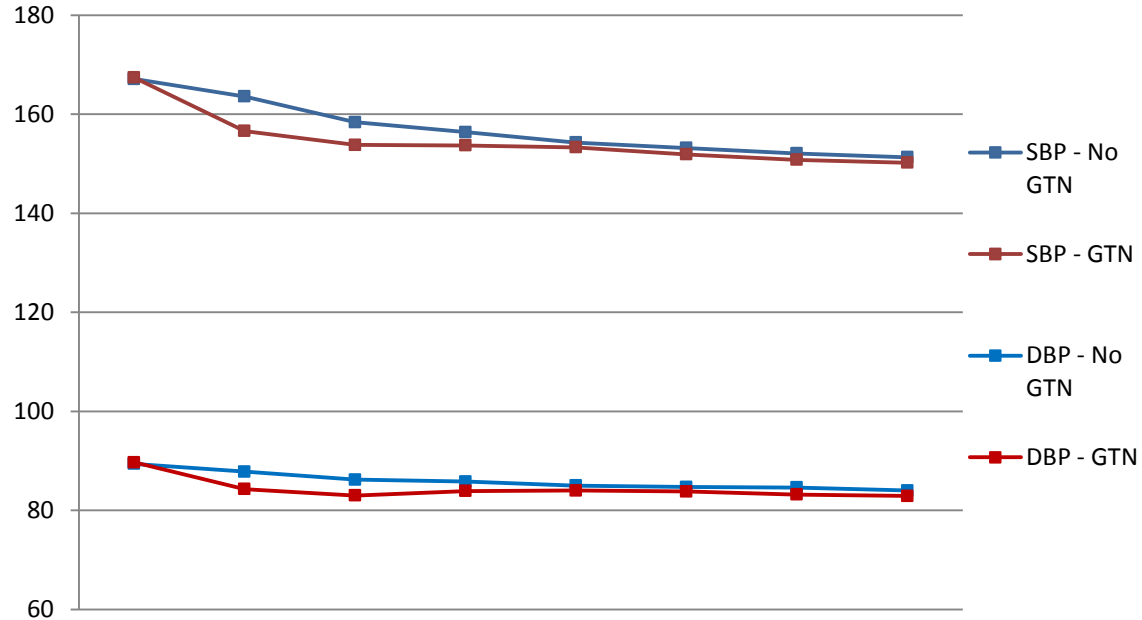

|                 | 0     | 1      | 2      | 3     | 4     | 5     | 6     | 7     |
|-----------------|-------|--------|--------|-------|-------|-------|-------|-------|
| SBP - No GTN    | 167.1 | 163.6  | 158.4  | 156.4 | 154.3 | 153.2 | 152.1 | 151.3 |
| SBP - No GTN SD | 19.2  | 22.4   | 23.2   | 24.5  | 24    | 24.5  | 24.7  | 23.6  |
| SBP - GTN       | 167.4 | 156.6  | 153.8  | 153.7 | 153.3 | 151.9 | 150.8 | 150.2 |
| SBP - GTN SD    | 18.7  | 22.6   | 24     | 24.2  | 24.4  | 24.5  | 24.4  | 24    |
| DBP - No GTN    | 89.4  | 87.8   | 86.2   | 85.8  | 85    | 84.7  | 84.6  | 84    |
| DBP - No GTN SD | 13.3  | 14.5   | 14.8   | 14.9  | 14.9  | 14.7  | 14.8  | 14.4  |
| DBP - GTN       | 89.7  | 84.3   | 83     | 83.9  | 84    | 83.8  | 83.2  | 82.9  |
| DBP - GTN SD    | 13    | 14.1   | 14.5   | 14.2  | 14.4  | 14.9  | 14.6  | 14.7  |
| SBP (MD)        | -0.3  | 7      | 4.6    | 2.7   | 1     | 1.3   | 1.3   | 1.1   |
| DBP (MD)        | -0.3  | 3.5    | 3.2    | 1.9   | 1     | 0.9   | 1.4   | 1.1   |
| SBP 2p          | 0.83  | 0.0001 | 0.0004 | 0.053 | 0.5   | 0.38  | 0.37  | 0.45  |
| DBP 2p          | 0.67  | 0.0001 | 0.0001 | 0.021 | 0.21  | 0.33  | 0.12  | 0.2   |

Day 0 is at randomisation; day 1 is 2 hours post-treatment. SBP MD and DBP MD signify mean difference in systolic and diastolic blood pressure between the two treatment groups. Comparisons by independent *t* test at each time point, and repeated measures analysis of variance:  $P < 0.0001 / < 0.0001$ . Both systolic and diastolic blood pressure had diverged by day two.



Day 0 is at randomisation; day 1 is 2 hours post-treatment. SBP MD and DBP MD signify mean difference in systolic and diastolic blood pressure between the two treatment groups. Comparisons by independent *t* test at each time point, and repeated measures analysis of variance:  $P < 0.0001 / < 0.0001$ . Both systolic and diastolic blood pressure had diverged by day two.



1 **Web Figure 2a. Survival curves over the 90 days of follow-up: glyceryl trinitrate**  
2 **versus no glyceryl trinitrate.**

3

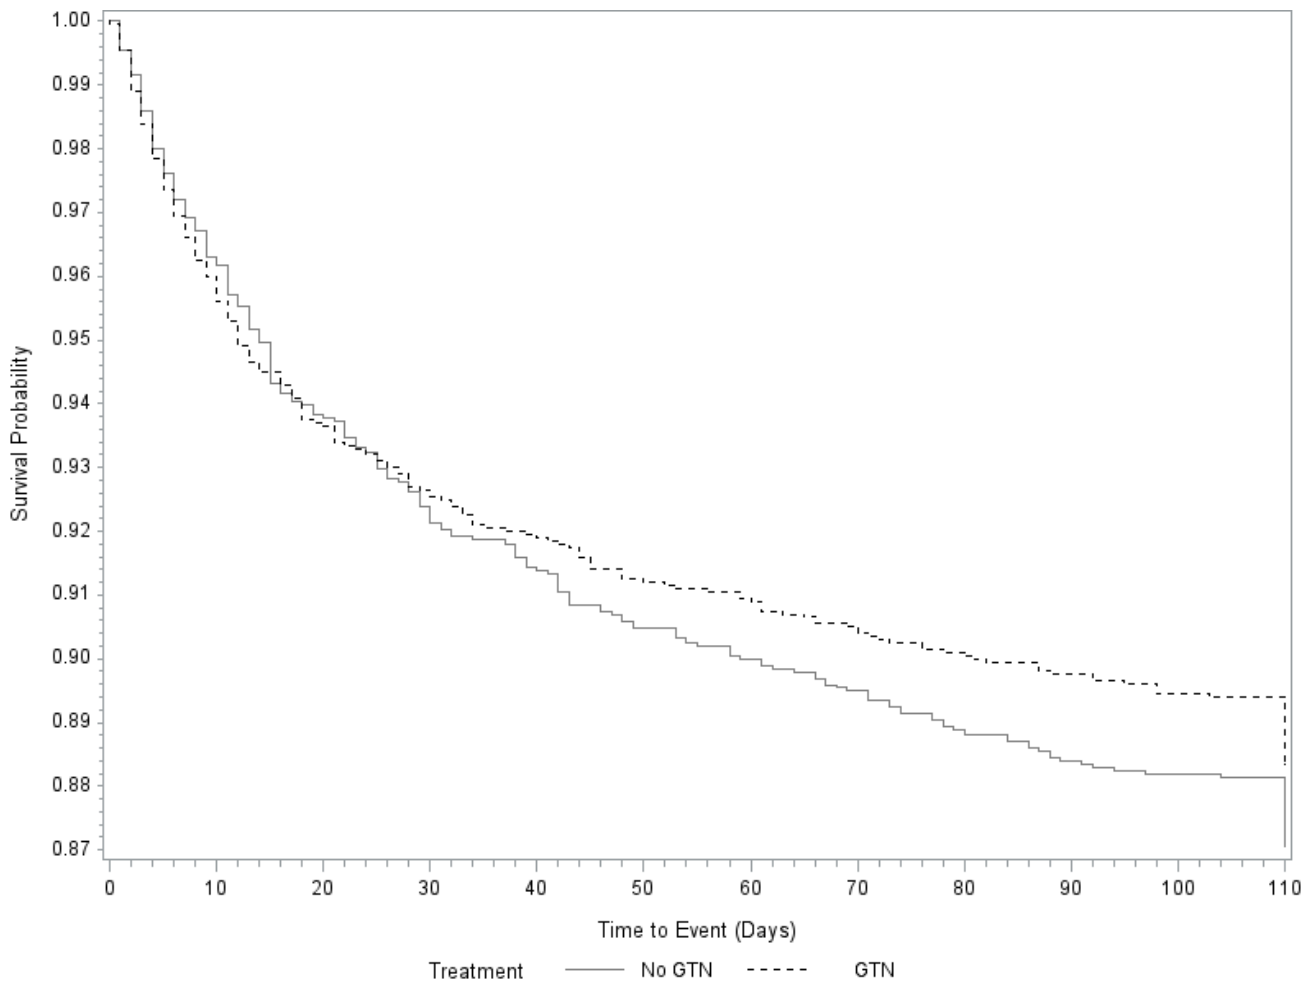

4

5

6 Comparison by Cox proportional regression, with adjustment for age, sex, pre-morbid  
7 mRS, history of previous stroke, history of diabetes, severity, stroke syndrome (Total  
8 Anterior Circulation), stroke type (ischaemic, haemorrhagic, not stroke), systolic blood  
9 pressure, alteplase, feeding status, and time to randomisation: hazard ratio=0.93 (95%  
10 CI 0.78, 1.12), p=0.44. Date of death was not available for some non-UK patients.

11

12

13

14

15 **Web Figure 2b. Survival curves over the 90 days of follow-up: continue versus**  
16 **stop pre-stroke antihypertensive drugs.**  
17

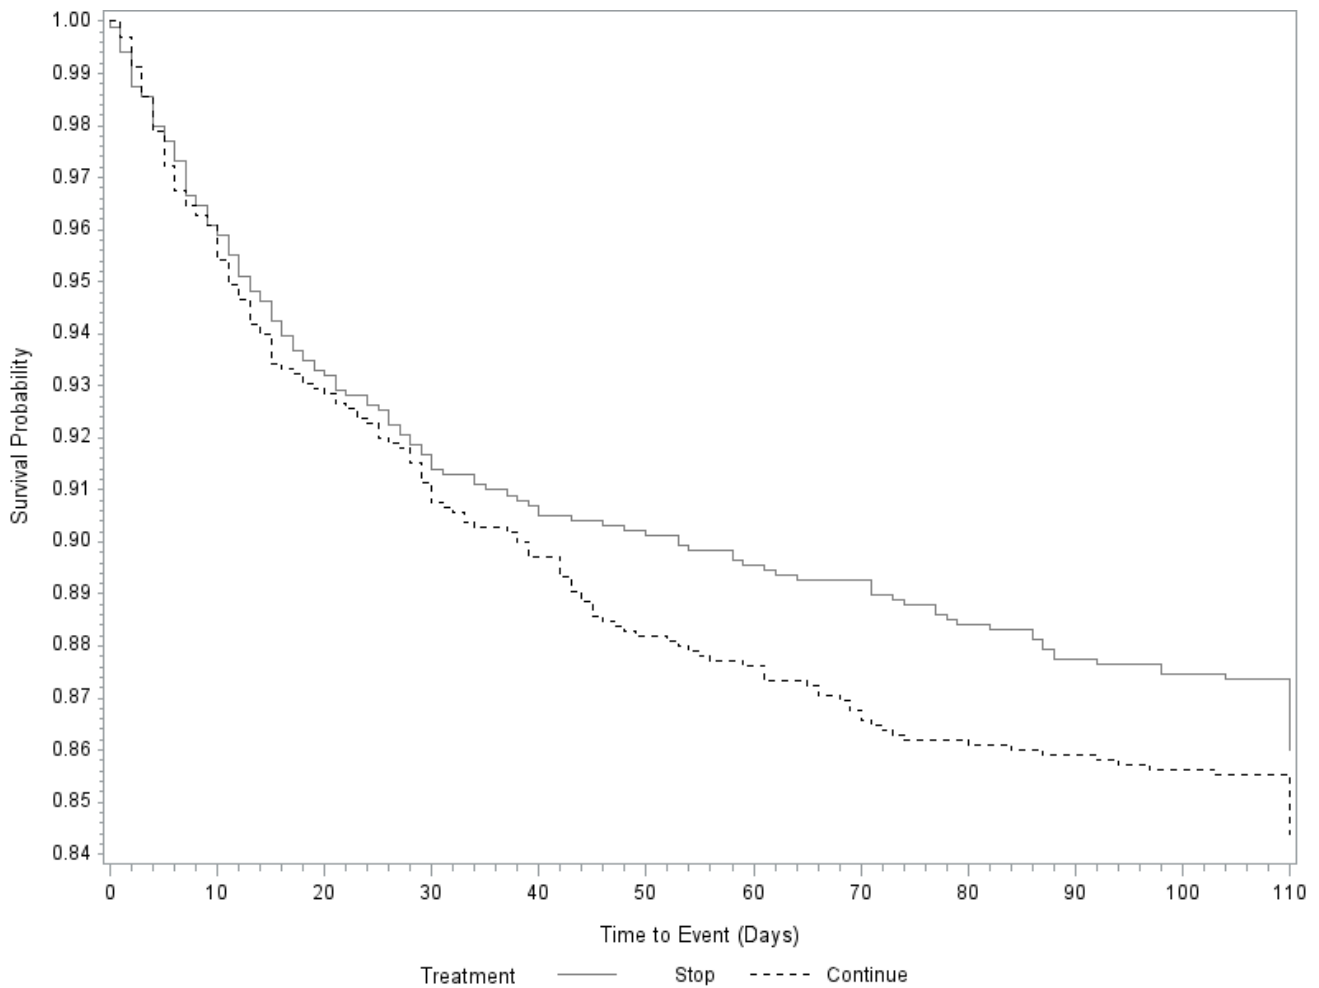

18  
19  
20 Comparison by Cox proportional regression, with adjustment for age, sex, pre-morbid  
21 mRS, history of previous stroke, history of diabetes, severity, stroke syndrome (Total  
22 Anterior Circulation), stroke type (ischaemic, haemorrhagic, not stroke), systolic blood  
23 pressure, alteplase, feeding status, and time to randomisation: hazard ratio=1.02 (0.81,  
24 1.27),  $p=0.88$ . Date of death was not available for some non-UK patients.  
25  
26

27 **Web Figure 3. Functional outcome in pre-specified subgroups: continue versus**  
28 **stop pre-stroke antihypertensive drugs.**

29

30 The primary outcome of the study was independence, dependence or death, assessed  
31 using the modified Rankin scale (scores of 0, 5 and 6 indicate no symptoms, severe  
32 dependency, and death respectively) at 90 days. The black squares represent point  
33 estimates for the odds ratio (with the area of the square proportional to the number of  
34 events), and the horizontal lines represent 95% confidence intervals. The rectangle  
35 incorporates the point estimate and the 95% confidence intervals of the overall effects  
36 within categories. P values are for the interaction between subgroup and allocated  
37 treatment. Stroke type covers ischaemic stroke, haemorrhagic stroke, stroke of  
38 unknown type and non-stroke. Stroke severity is measured using the Scandinavian  
39 Stroke Scale (SSS) which ranges from 0 (deep coma) to 58 (normal neurological status).  
40 Stroke syndrome is assessed using the Oxfordshire Community Stroke Project: total  
41 anterior circulation syndrome (TACS), partial anterior circulation syndrome (PACS),  
42 posterior circulation syndrome (POCS) and lacunar syndrome (LACS).

43

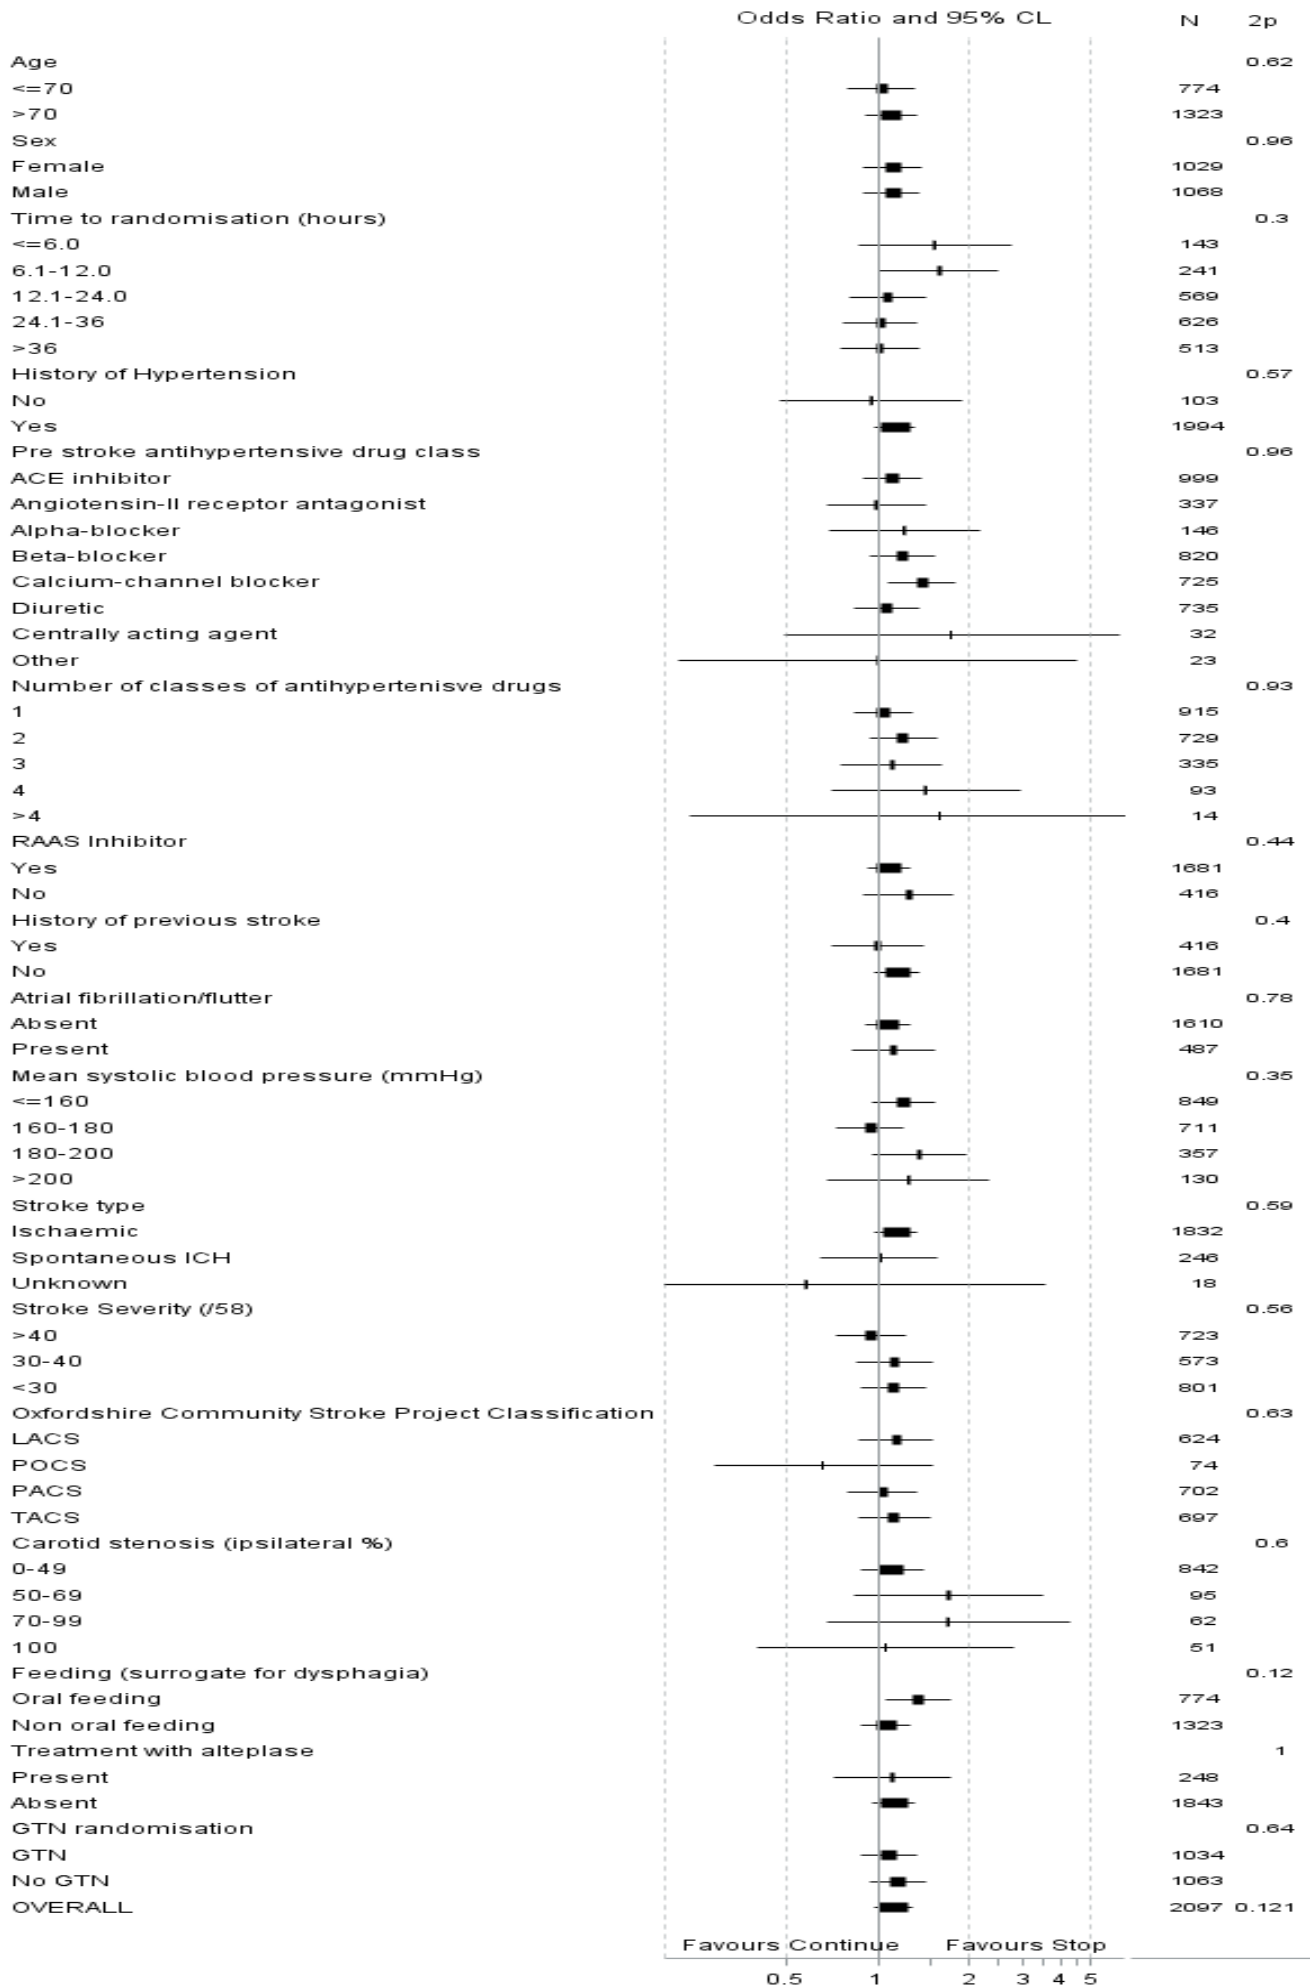

68 **Web Figure 4a. Meta-analysis of effect of lowering blood pressure on death or**  
 69 **dependency (modified Rankin Scale >2). Includes data for glyceryl trinitrate**  
 70 **versus no glyceryl trinitrate.**

71  
 72 Trials in acute stroke involving drugs which lower blood pressure and which enrolled  
 73 more than 100 patients. Updated from <sup>9</sup>  
 74

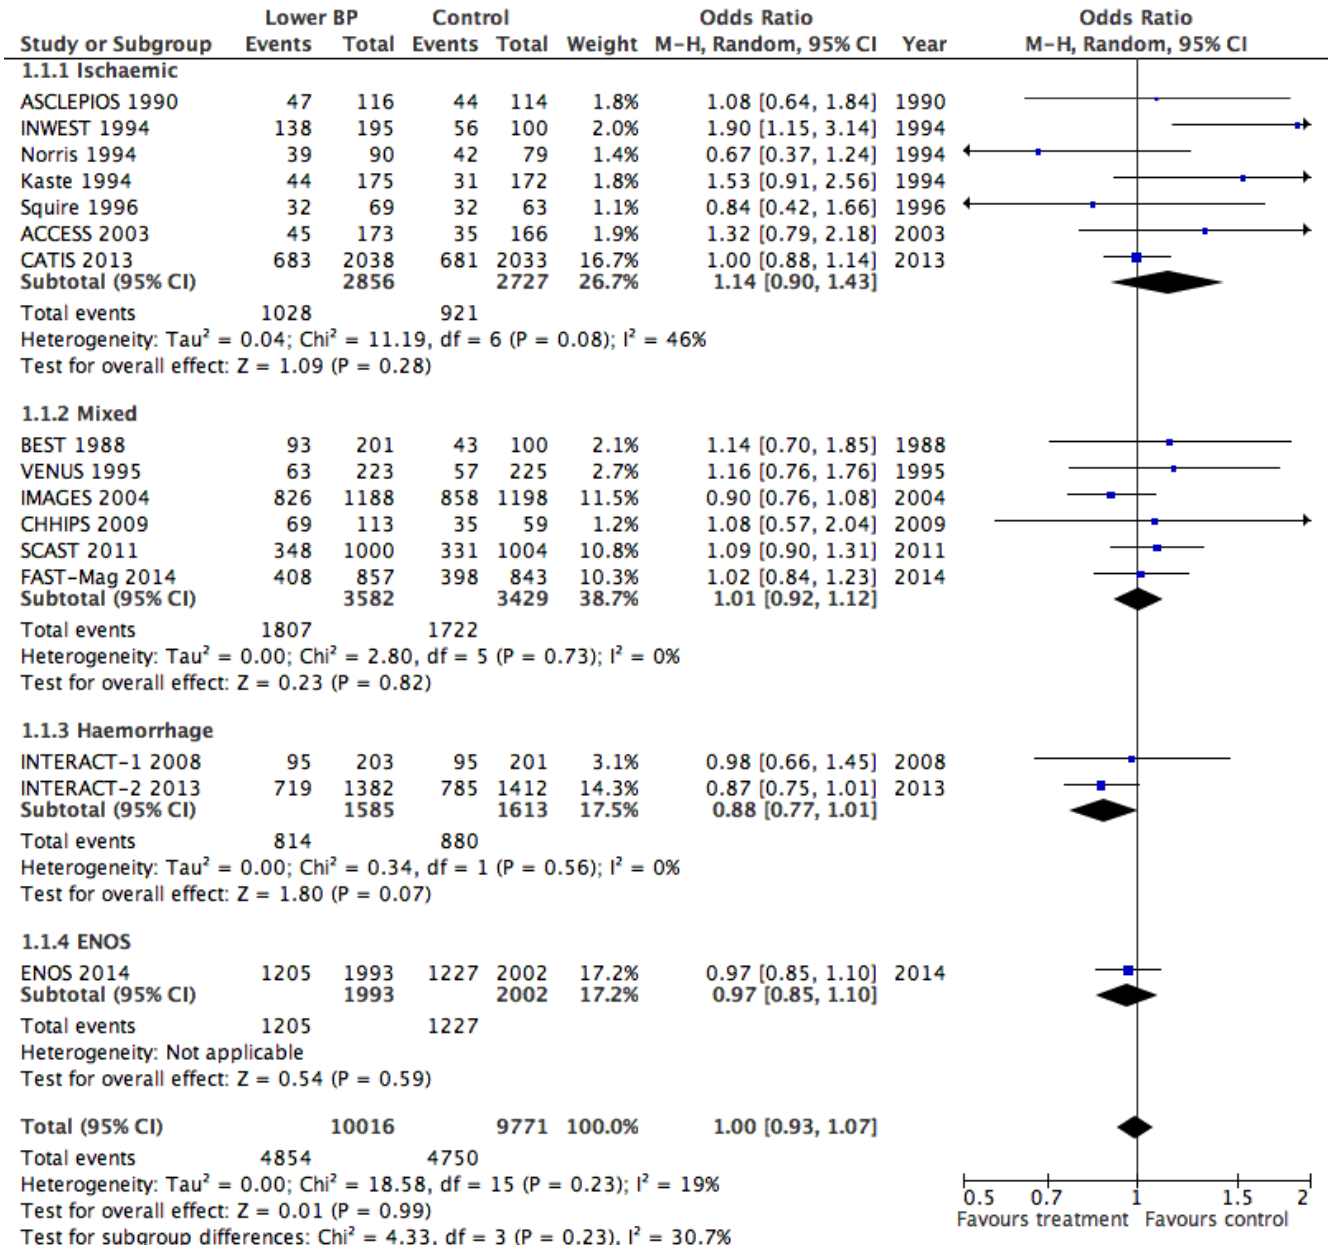

75  
 76  
 77  
 78

79 **Panel: Research in context**

80

81 **Systematic review**

82 We performed a meta-analysis of randomised controlled trials that compared continuing  
 83 versus stopping pre-stroke antihypertensive agents in patients with acute stroke. Trials  
 84 were identified through searches of the Cochrane Library, PubMed and Embase (up to  
 85 December 2013), and in relevant reference lists. Data were available for 2860 patients  
 86 for 2 trials (COSSACS<sup>12</sup> and ENOS). Overall, there was no effect of continuing blood  
 87 pressure treatment (as compared to stopping it temporarily) on functional outcome,  
 88 odds ratio 1.04 (0.90, 1.22), P=0.58, and no statistical evidence of heterogeneity (chi-  
 89 square 0.01, P=0.93; I<sup>2</sup> = 0%).

90

91 **Interpretation**

92 There is no evidence that continuing blood pressure treatment, as compared to stopping  
 93 it temporarily, improves functional outcome in patients with acute stroke.

94

95

96 **Web Figure 4b. Meta-analysis of trials comparing a policy of continuing versus**  
 97 **temporary withdrawal of pre-stroke antihypertensive therapy in patients with**  
 98 **acute stroke: effect on death or dependency (modified Rankin Scale 3-6).**

99

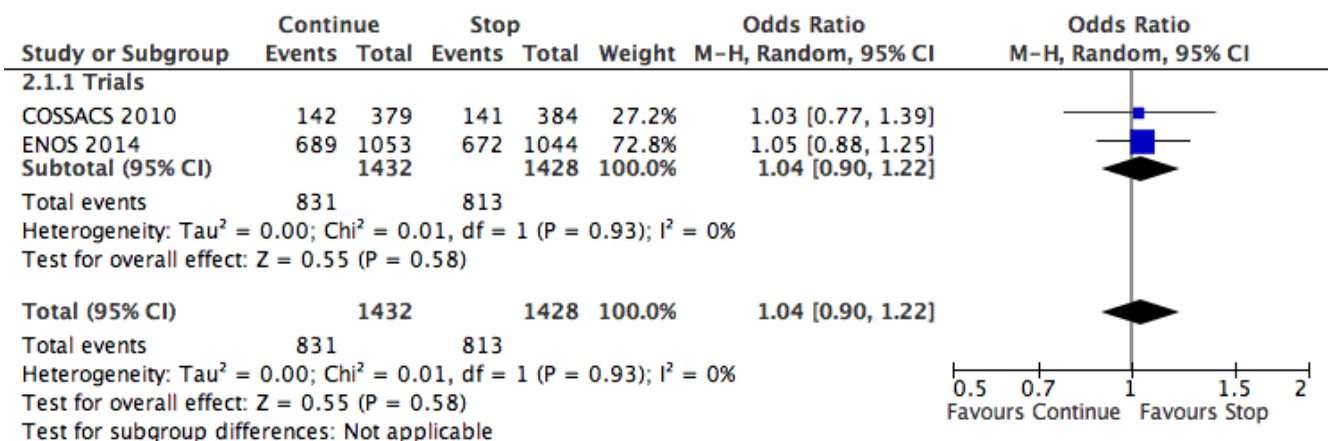

100  
 101  
 102  
 103  
 104

105 **References**

106  
107  
108  
109  
110  
111  
112  
113  
114  
115  
116  
117  
118  
119  
120  
121  
122  
123  
124  
125  
126  
127  
128  
129  
130  
131  
132  
133  
134  
135  
136  
137  
138  
139  
140  
141  
142  
143  
144  
145  
146

1. Buyse M, George SL, Evans S, et al. The role of biostatistics in the prevention, detection and treatment of fraud in clinical trials. *Stat Med* 1999; 18(24): 3435-51.
2. The ENOS Trial Investigators. Glyceryl trinitrate vs. control, and continuing vs. stopping temporarily prior antihypertensive therapy, in acute stroke: rationale and design of the Efficacy of Nitric Oxide in Stroke (ENOS) trial (ISRCTN99414122). *International Journal of Stroke* 2006; 1: 245-9.
3. The Optimising Analysis of Stroke Trials (OAST) Collaboration. Can we improve the statistical analysis of stroke trials? Statistical re-analysis of functional outcomes in stroke trials. *Stroke* 2007; 38: 1911-5.
4. Bath PM, Lees KR, Schellinger PD, et al. Statistical analysis of the primary outcome in acute stroke trials *Stroke* 2012; 43(4): 1171-8.
5. Gray LJ, Bath PM, Collier T. Should stroke trials adjust functional outcome for baseline prognostic factors? *Stroke* 2009; 40(3): 888-94.
6. Wardlaw JM, Farrall AJ, Perry D, et al. Factors influencing the detection of early CT signs of cerebral ischemia: an internet-based, international multiobserver study. *Stroke* 2007; 38(4): 1250-6.
7. Wardlaw JM, von Kummer R, Farrall AJ, Chappell FM, Hill M, Perry D. A large web-based observer reliability study of early ischaemic signs on computed tomography. The Acute Cerebral CT Evaluation of Stroke Study (ACCESS). *PLoS One* 2010; 5(12): e15757.
8. Bath PM, Houlton A, Woodhouse L, Sprigg N, Wardlaw J, Pocock S. Statistical analysis plan for the 'Efficacy of Nitric Oxide in Stroke' (ENOS) trial. *Int J Stroke* 2014; 9(3): 372-4.
9. Sandset EC, Bath PM, Boysen G, et al. The angiotensin-receptor blocker candesartan for treatment of acute stroke (SCAST): a randomised, placebo-controlled, double-blind trial. *Lancet* 2011; 377(9767): 741-50.
10. Anderson CS, Heeley E, Huang Y, et al. Rapid blood-pressure lowering in patients with acute intracerebral hemorrhage. *N Engl J Med* 2013; 368(25): 2355-65.
11. He J, Zhang Y, Xu T, et al. Effects of Immediate Blood Pressure Reduction on Death and Major Disability in Patients With Acute Ischemic Stroke: The CATIS Randomized Clinical Trial. *JAMA* 2013.
12. Robinson TG, Potter JF, Ford GA, et al. Effects of antihypertensive treatment after acute stroke in the Continue or Stop Post-Stroke Antihypertensives Collaborative Study (COSSACS): a prospective, randomised, open, blinded-endpoint trial. *Lancet Neurol* 2010; 9(8): 767-75.
